# Supplementary material
Source: PubMed Central journal article supplement (PMC4569145)
Supplement: NIHMS720064-supplement-Supplemental_Table.pdf [file NIHMS720064-supplement-Supplemental_Table.pdf]

**Supplemental Table 1:** Descriptive statistics of pancreas donor demographics. Data are mean±SEM and range where applicable.

|                                                          |                                          |
|----------------------------------------------------------|------------------------------------------|
| <b>Donor Pancreas</b>                                    | N = 64 (9%)                              |
| Gender (M/F)                                             | 44 / 20<br>(68.8 % males)                |
| Age                                                      | 39.9 ± 9.6<br>(24 – 60)                  |
| BMI                                                      | 30.1 ± 6.9<br>( 20.2 – 43)               |
| Amylase [u/L]                                            | 114.9 ± 229.5<br>(14 – 1118)             |
| SGOT (U/L)                                               | 69.3 ± 57.1<br>(13 – 209)                |
| SGPT (U/L)                                               | 61.0 ± 46.1<br>(12 - 162)                |
| ICU Time (days)                                          | 2.8 ± 2.0<br>(1 – 8)                     |
| Cold Ischemia Time (hrs:min)                             | 6:40 ± 3:39<br>(1:30 – 13:28)            |
| DBD/ DCD                                                 | 62/2 (96.9%)                             |
|                                                          |                                          |
| <b>Islet Isolation Results and Islet Quality Control</b> |                                          |
| Yield (IEQ)                                              | 571,297.34 ± 93,876<br>(83630 – 1600000) |
| Yield (Islet Particles)                                  | 399144.0 ± 222242.7                      |
| Yield(IEQ)/Pancreas weight (g)<br>(IEQ/g pancreas)       | 8264.0 ± 3542.3                          |
| Purity (%)                                               | 86.2 ± 6.7                               |
| Viability (FDA/PI)                                       | 92.1 ± 3.3                               |
| Endotoxin (EU/prep)                                      | 197.7 ± 327.3                            |
